# Supplementary material for: The impact of solvents on the singlet and triplet states of selected fluorine corroles – absorption, fluorescence, and optoacoustic studies
Source: Royal Society of Chemistry journal article supplement (doi:10.1039/c5cp06335c), 2016-01-01
Supplement: c5cp06335c1.pdf [file c5cp06335c1.pdf]

**Solvent impact on the singlet and triplet states of selected fluorine corroles – absorption,  
fluorescence, and optoacoustic studies**

**Electronic Supplementary Information (ESI)**

Bartosz Bursa<sup>1</sup>, Danuta Wróbel<sup>1\*</sup>, Bolesław Barszcz<sup>1,2</sup>, Michał Kotkowiak<sup>1</sup>, Olena Vakuliuk<sup>3</sup>,  
Daniel T. Gryko<sup>3\*</sup>, Łukasz Kolanowski<sup>4</sup>, Marek Baraniak<sup>4</sup>, Grzegorz Lota<sup>4</sup>

<sup>1</sup>Faculty of Technical Physics, Institute of Physics, Poznan University of Technology,  
Piotrowo 3, 60-965 Poznan, Poland

<sup>2</sup>Institute of Molecular Physics, Polish Academy of Sciences, Smoluchowskiego 17, 60-179  
Poznan, Poland

<sup>3</sup>Institute of Organic Chemistry, Polish Academy of Sciences, Kasprzaka 44/52, 01-224  
Warsaw, Poland

<sup>4</sup>Institute of Chemistry and Technical Electrochemistry, Poznan University of Technology,  
Berdychowo 4, 60-965 Poznan, Poland

**Corresponding authors:**

prof. D. Wróbel; e-mail: danuta.wrobel@put.poznan.pl

prof. D. T. Gryko; e-mail: dtgryko@icho.edu.pl

**Table S1** TD-DFT calculated transitions of corrole **1**. The table is limited to the transitions with oscillator strength > 0.1 and wavelength > 200 nm. Additionally, the first transition for the isolated species is also included.

| Wavelength (nm)        | Osc. Strength | Major contribution                                            |
|------------------------|---------------|---------------------------------------------------------------|
| Isolated <sup>21</sup> |               |                                                               |
| 575                    | 0.0568        | H-1→→LUMO (17%), HOMO→LUMO (22%), HOMO→L+1 (53%)              |
| 560                    | 0.1808        | H-1→LUMO (19%), H-1→L+2 (10%), HOMO→LUMO (46%)                |
| 515                    | 0.1576        | H-1→LUMO (22%), H-1→L+1 (14%), HOMO→L+1 (24%), HOMO→L+2 (33%) |
| 495                    | 0.1214        | H-1→LUMO (13%), H-1→L+1 (60%), H-1→L+2 (11%)                  |
| 391                    | 0.6029        | H-1→LUMO (12%), HOMO→L+2 (38%)                                |
| 382                    | 0.4419        | H-2→LUMO (32%), H-2→L+1 (11%), H-1→L+2 (29%)                  |
| 369                    | 0.505         | H-2→LUMO (55%), H-1→L+2 (22%)                                 |
| 361                    | 0.1345        | H-2→L+1 (76%)                                                 |
| 342                    | 0.156         | HOMO→L+3 (77%)                                                |
| 312                    | 0.3245        | H-2→L+2 (25%), H-1→L+4 (47%)                                  |
| In TL                  |               |                                                               |
| 626                    | 0.1608        | HOMO→LUMO (89%)                                               |
| 580                    | 0.1241        | H-1→LUMO (55%), HOMO→L+1 (32%)                                |
| 535                    | 0.3312        | H-1→LUMO (40%), H-1→L+2 (12%), HOMO→L+1 (35%)                 |
| 530                    | 0.115         | H-1→L+1 (59%), HOMO→L+2 (33%)                                 |
| 407                    | 0.8755        | H-1→L+1 (17%), HOMO→L+2 (48%)                                 |
| 392                    | 1.0567        | H-1→L+2 (61%)                                                 |
| 370                    | 0.215         | H-2→L+1 (82%)                                                 |
| 347                    | 0.1327        | HOMO→L+3 (87%)                                                |
| 319                    | 0.1329        | H-17→LUMO (19%), H-1→L+4 (65%)                                |
| 317                    | 0.2496        | H-2→L+2 (56%)                                                 |
| 206                    | 0.1014        | H-9→L+3 (10%), H-2→L+11 (35%), HOMO→L+13 (23%)                |
| In CL                  |               |                                                               |
| 657                    | 0.1639        | HOMO→LUMO (93%)                                               |
| 546                    | 0.331         | H-1→LUMO (17%), H-1→L+2 (15%), HOMO→L+1 (48%)                 |
| 531                    | 0.1437        | H-1→L+1 (53%), HOMO→L+2 (32%)                                 |
| 407                    | 0.8748        | H-1→L+1 (18%), HOMO→L+2 (46%)                                 |
| 392                    | 1.0881        | H-1→L+2 (61%)                                                 |
| 368                    | 0.1843        | H-2→L+1 (84%)                                                 |
| 346                    | 0.1269        | HOMO→L+3 (88%)                                                |
| 319                    | 0.1113        | H-2→L+2 (14%), H-1→L+4 (67%)                                  |

|         |        |                                               |
|---------|--------|-----------------------------------------------|
| 316     | 0.2137 | H-2→L+2 (50%)                                 |
| 206     | 0.1326 | H-2→L+11 (48%), HOMO→L+13 (27%)               |
| In DMSO |        |                                               |
| 691     | 0.1715 | HOMO→LUMO (94%)                               |
| 551     | 0.3523 | H-1→L+2 (16%), HOMO→L+1 (58%)                 |
| 531     | 0.1326 | H-1→L+1 (54%), HOMO→L+2 (32%)                 |
| 408     | 0.8858 | H-1→L+1 (18%), HOMO→L+2 (44%)                 |
| 392     | 1.1479 | H-1→L+2 (62%)                                 |
| 365     | 0.1506 | H-2→L+1 (86%)                                 |
| 344     | 0.1138 | HOMO→L+3 (89%)                                |
| 319     | 0.2547 | H-6→LUMO (11%), H-4→LUMO (21%), H-1→L+4 (57%) |
| 316     | 0.1005 | H-4→LUMO (13%), H-2→L+2 (55%)                 |

**Table S2** TD-DFT calculated transitions of corrole **2**. The table is limited to the transitions with oscillator strength > 0.1 and wavelength > 200 nm. Additionally, the first transition for the isolated species is also included. H – HOMO, L – LUMO.

| Wavelength (nm)        | Osc. Strength | Major contribution                                               |
|------------------------|---------------|------------------------------------------------------------------|
| Isolated <sup>21</sup> |               |                                                                  |
| 547                    | 0.0875        | H-1→LUMO (36%), H-1→L+1 (10%), HOMO→LUMO (25%), HOMO→L+1 (27%)   |
| 534                    | 0.1511        | H-1→LUMO (21%), H-1→L+1 (16%), HOMO→LUMO (40%), HOMO→L+1 (15%)   |
| 396                    | 0.7181        | H-1→LUMO (18%), HOMO→L+1 (33%)                                   |
| 387                    | 0.7593        | H-2→LUMO (16%), H-1→L+1 (37%)                                    |
| 370                    | 0.3045        | H-2→LUMO (74%), H-1→L+1 (10%)                                    |
| 322                    | 0.133         | H-1→L+2 (39%), H-1→L+3 (11%), HOMO→L+3 (11%)                     |
| 313                    | 0.1133        | H-1→L+3 (48%), HOMO→L+7 (18%)                                    |
| 310                    | 0.1859        | H-1→L+4 (79%)                                                    |
| 306                    | 0.1107        | H-11→LUMO (15%), H-10→LUMO (14%), H-9→LUMO (19%), H-7→LUMO (14%) |
| In TL                  |               |                                                                  |
| 553                    | 0.2165        | H-1→LUMO (22%), H-1→L+1 (14%), HOMO→LUMO (45%), HOMO→L+1 (15%)   |
| 541                    | 0.1491        | H-1→LUMO (39%), HOMO→LUMO (25%), HOMO→L+1 (25%)                  |
| 412                    | 0.9916        | H-1→LUMO (20%), HOMO→L+1 (42%)                                   |
| 401                    | 1.1947        | H-1→L+1 (57%)                                                    |
| 369                    | 0.1186        | H-2→LUMO (87%)                                                   |
| 326                    | 0.1065        | H-2→L+1 (12%), H-1→L+2 (44%), H-1→L+3 (10%)                      |
| 317                    | 0.1415        | H-1→L+3 (54%), HOMO→L+7 (16%)                                    |
| 315                    | 0.2002        | H-1→L+4 (84%)                                                    |

|         |        |                                                                |
|---------|--------|----------------------------------------------------------------|
| 251     | 0.1033 | H-2→L+2 (10%), H-2→L+3 (31%), H-2→L+4 (16%), H-1→L+11 (20%)    |
| In CL   |        |                                                                |
| 552     | 0.2075 | H-1→LUMO (21%), H-1→L+1 (15%), HOMO→LUMO (46%), HOMO→L+1 (14%) |
| 539     | 0.1366 | H-1→LUMO (39%), HOMO→LUMO (24%), HOMO→L+1 (25%)                |
| 411     | 0.9813 | H-1→LUMO (20%), HOMO→L+1 (42%)                                 |
| 400     | 1.2065 | H-1→L+1 (57%)                                                  |
| 366     | 0.1051 | H-2→LUMO (87%)                                                 |
| 317     | 0.1414 | H-1→L+3 (56%), HOMO→L+7 (11%)                                  |
| 314     | 0.2202 | H-1→L+4 (81%)                                                  |
| 251     | 0.1193 | H-2→L+3 (29%), H-2→L+4 (10%), H-1→L+11 (27%)                   |
| In DMSO |        |                                                                |
| 551     | 0.2192 | H-1→LUMO (18%), H-1→L+1 (16%), HOMO→LUMO (50%), HOMO→L+1 (12%) |
| 538     | 0.1192 | H-1→LUMO (42%), HOMO→LUMO (20%), HOMO→L+1 (28%)                |
| 410     | 1.0153 | H-1→LUMO (20%), HOMO→L+1 (42%)                                 |
| 400     | 1.2621 | H-1→L+1 (57%)                                                  |
| 316     | 0.1256 | H-1→L+3 (58%)                                                  |
| 313     | 0.2129 | H-1→L+4 (82%)                                                  |
| 303     | 0.11   | H-5→LUMO (48%), H-1→L+6 (20%)                                  |
| 249     | 0.133  | H-2→L+3 (31%), H-1→L+11 (32%)                                  |
